# Supplementary material for: Selective Targeting of Protein Kinase C (PKC)-θ Nuclear Translocation Reduces Mesenchymal Gene Signatures and Reinvigorates Dysfunctional CD8+ T Cells in Immunotherapy-Resistant and Metastatic Cancers
Source: MDPI journal article supplement (doi:10.3390/cancers14061596), 2022-03-21
Supplement: s1 [file s1]

## Supplementary Materials

### Selective targeting of protein kinase C (PKC)- $\theta$ nuclear translocation reduces mesenchymal gene signatures and reinvigorates dysfunctional CD8<sup>+</sup> T cells in immunotherapy-resistant and metastatic cancers

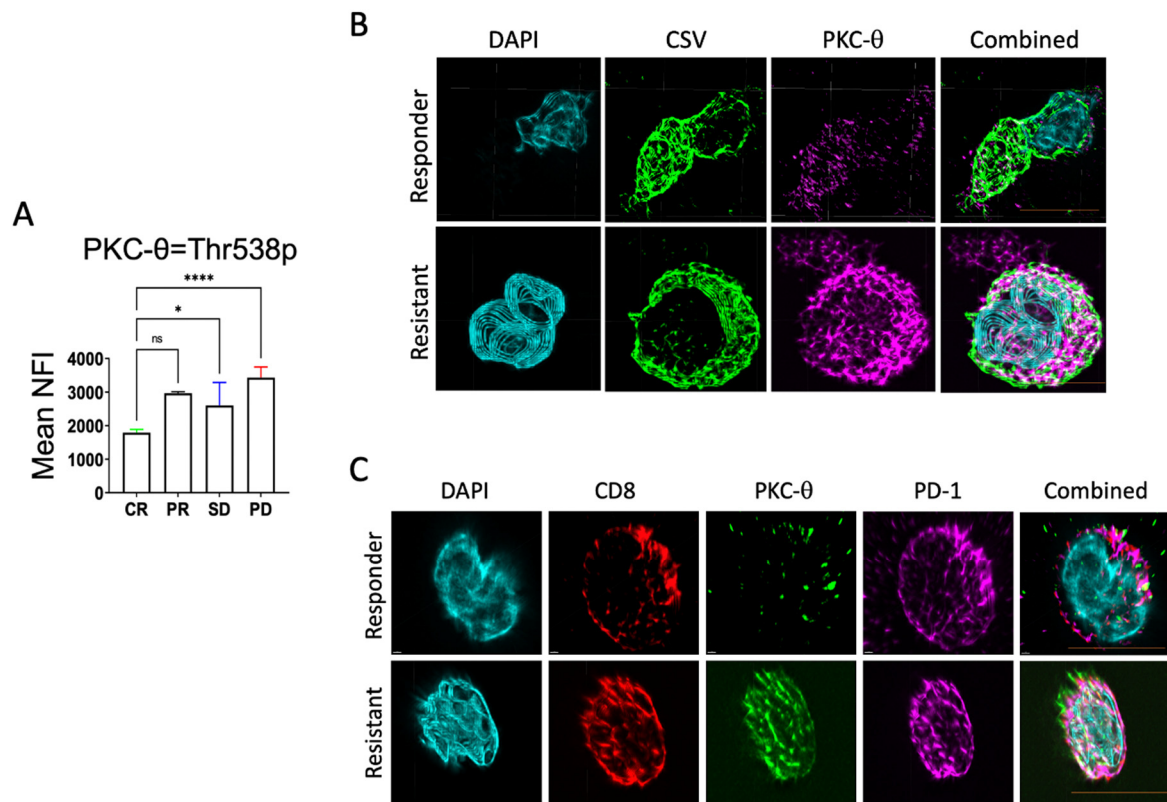

**Figure S1.** (A) Depicts bar graph quantification of PKC- $\theta$ -Thr568p fluorescence intensity in circulating tumor cells (CTCs) isolated from immunotherapy responsive (CR, partial response (PR)) or resistant (stable disease (SD), PD) melanoma patients defined using RECIST 1.1 criteria. The mean NFI for PKC- $\theta$ -Thr568p was quantified by ASI digital pathology. (B) Representative image of melanoma responder or resistant CTCs imaged using the Andor WD Revolution Inverted Spinning Disk microscopy system. Cells were permeabilized and immunostained with antibodies targeting CSV and PKC- $\theta$ ; DAPI (blue) was used to visualize nuclei. Scale bar is 10  $\mu$ m. (C) Representative image of melanoma responder or resistant CD8<sup>+</sup> T cells imaged using the Andor WD Revolution Inverted Spinning Disk microscopy system. Cells were permeabilized and immunostained with antibodies targeting CD8, PD-1, and PKC- $\theta$ ; DAPI (blue) was used to visualize nuclei. Scale bar is 10  $\mu$ m. \*\*\*\* $p$ <0.0001, \* $p$ <0.05.

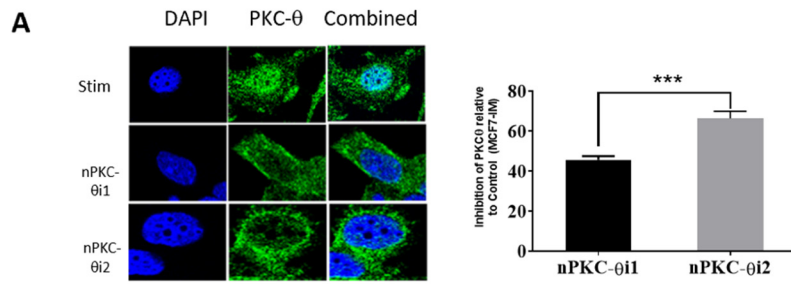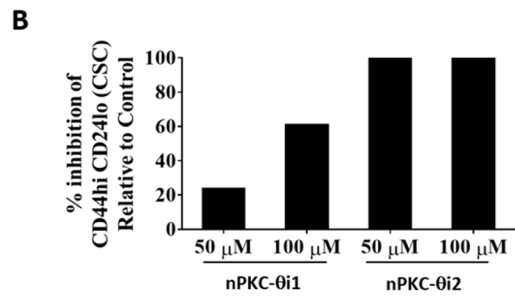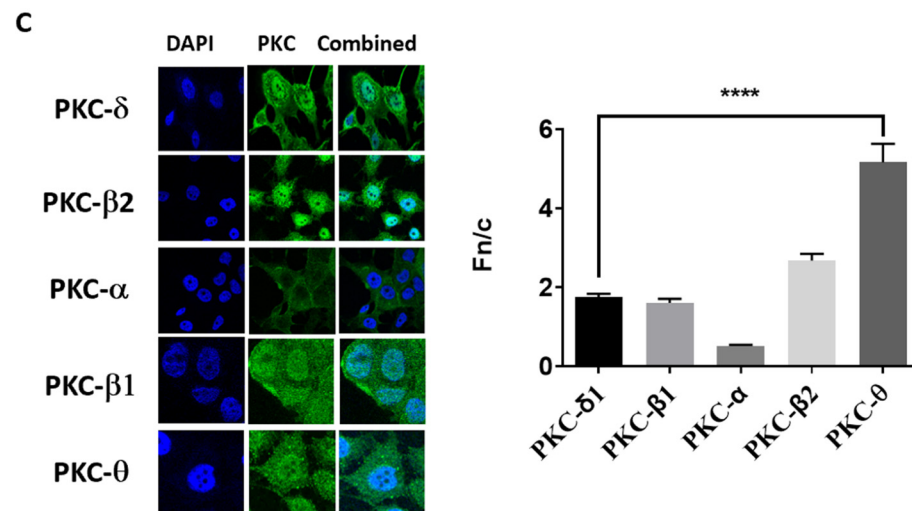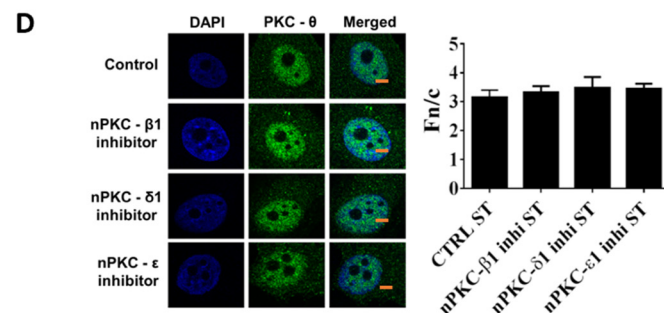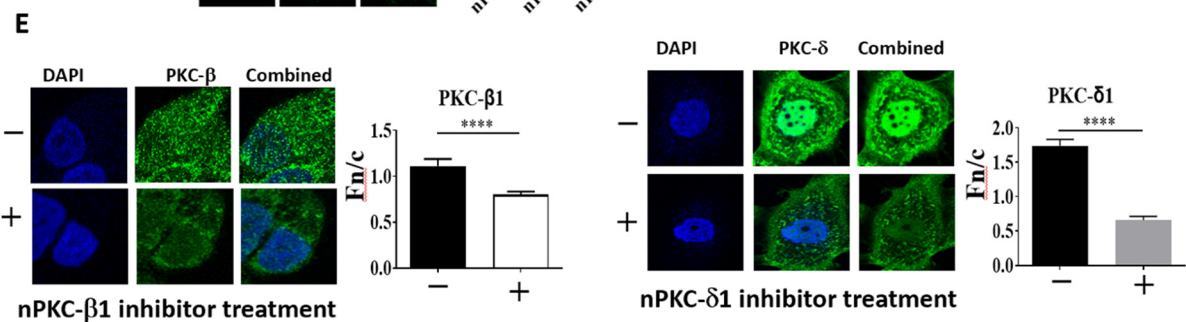

**Figure S2.** (A) Immunohistofluorescence analysis of PKC- $\theta$  expression in mesenchymal MCF-7 inducible model (MCF7-IM) cells inhibited with nPKC- $\theta$ i1 or nPKC- $\theta$ i2. (B) The CD44hi/CD24lo signature assessed by FACS in mesenchymal MCF-IM cells inhibited with nPKC- $\theta$ i1 or nPKC- $\theta$ i2. (C) Representative immunofluorescence microscopy pictures and Fn/c plots for MCF-7-IM cells labelled with antibodies targeting PKC- $\delta$ , - $\beta$ 2, - $\alpha$ , - $\beta$ 1 and - $\theta$ . Fn/c was used to determine the nuclear localization for  $n \geq 20$  cells. (D) The impact of the nPKC- $\theta$ i2 on the nuclear localization of PKC- $\theta$  and other PKCs (PKC- $\beta$ 2, PKC- $\xi$ , PKC- $\beta$ 1, PKC- $\delta$ , and PKC- $\alpha$ ). Representative immunofluorescence microscopy photomicrographs and the plot of Fn/c for MCF-7 cells treated with peptide inhibitors targeting PKC- $\beta$ 1, PKC- $\delta$ , and PKC- $\epsilon$ , where ST represents mesenchymal MCF-7-IM cells. Fn/c was used to determine the impact on nuclear localization for  $n \geq 20$  cells. The Mann-Whitney non-parametric *t*-test was used to compare groups where \*\*\*\* $p < 0.0001$ , \*\*\* $p < 0.001$ . Scale bar represents 5  $\mu$ m. (E) The impact of nPKC- $\beta$ 1 or nPKC- $\delta$ 1 on the nuclear localization of PKC- $\beta$ 1 or PKC- $\delta$ . Representative immunofluorescence microscopy photomicrographs and plot of Fn/c for MCF-7 cells treated with peptide inhibitors targeting PKC- $\beta$ 1 and PKC- $\delta$  in mesenchymal MCF-7-IM cells. Fn/c was used to determine the impact on nuclear localization for  $n \geq 20$  cells. The Mann-Whitney non-parametric *t*-test was used to compare groups where \*\*\*\* $p < 0.0001$ , \*\*\* $p < 0.001$ . Scale bar represents 5  $\mu$ m.

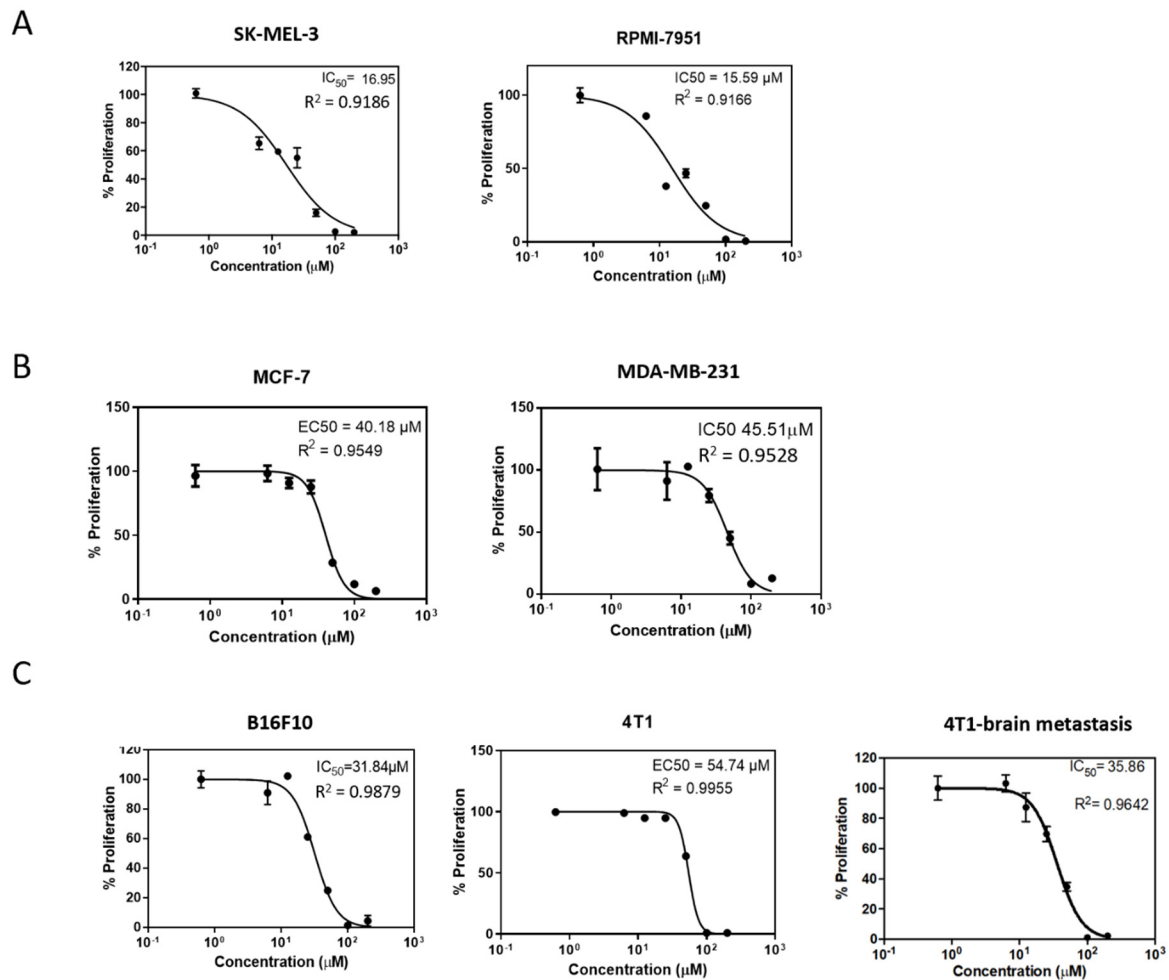

**Figure S3.** WST proliferation assay on (A) melanoma, (B) breast cancer, and (C) immunotherapy resistant cell lines showing the EC<sub>50</sub> of nPKC- $\theta$ i2 (PKC pep2) on the proliferation of these cell lines at 72 h post-inhibition.

A

| id        | group | Reads.     |            | Percent |       |
|-----------|-------|------------|------------|---------|-------|
|           |       | Human      | Mouse      | Human   | Mouse |
| A327/VEH1 | VEH   | 36,040,184 | 4,953,782  | 88      | 12    |
| A328/VEH2 | VEH   | 42,989,344 | 5,824,060  | 88      | 12    |
| A330/VEH3 | VEH   | 36,887,021 | 5,544,209  | 87      | 13    |
| B331/DOC1 | DOC   | 36,795,433 | 8,933,673  | 80      | 20    |
| B333/DOC2 | DOC   | 36,502,762 | 8,056,290  | 82      | 18    |
| B335/DOC3 | DOC   | 35,812,658 | 9,729,614  | 79      | 21    |
| E347/PKC1 | PKC   | 38,753,766 | 6,867,726  | 85      | 15    |
| E348/PKC2 | PKC   | 31,174,750 | 7,383,206  | 81      | 19    |
| E349/PKC3 | PKC   | 40,992,807 | 9,103,805  | 82      | 18    |
| H361/COM1 | COM   | 36,951,079 | 8,711,370  | 81      | 19    |
| H362/COM2 | COM   | 35,902,041 | 10,492,268 | 77      | 23    |
| H363/COM3 | COM   | 30,061,554 | 8,539,897  | 78      | 22    |
| H364/COM4 | COM   | 43,142,059 | 8,716,646  | 83      | 17    |

B

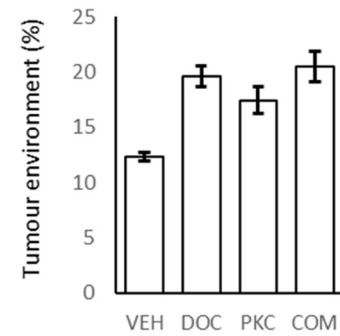

C

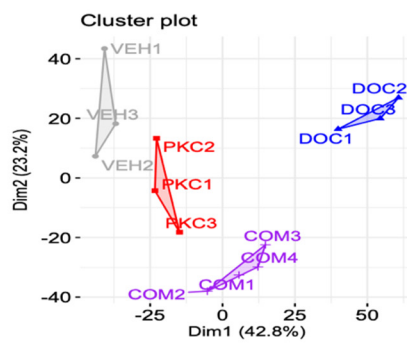

D

| A   | B    | UP (B>A) | DOWN (A>B) |
|-----|------|----------|------------|
| Veh | DOC  | 848      | 1052       |
| Veh | PKCi | 54       | 39         |
| Veh | COM  | 580      | 567        |
| DOC | COM  | 654      | 453        |

E

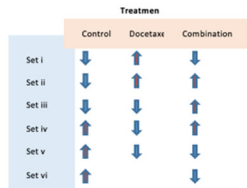

**Figure S4.** (A-B) Library sizes of RNA-seq reads uniquely mapping to the human (tumor) or mouse (tumor environment) genome. Library sizes from EdgeR. Graph shows averages from 3-4 mice +/- SEM. (C) PCA cluster plot of genes induced by different treatment groups docetaxel, nPKC- $\theta$ i2 and combination treatment. (D) Table of significantly (FDR 0.25,  $> \log_2$  0.5-fold change) differentially expressed genes in the various contrasts of vehicle (Veh), docetaxel (DOC), nPKC- $\theta$ i2 (PKCi), or docetaxel and PKC- $\theta$ i2 combination (COM) treated mice. (E) Summary of the upregulation/downregulation of genesets with different treatments.

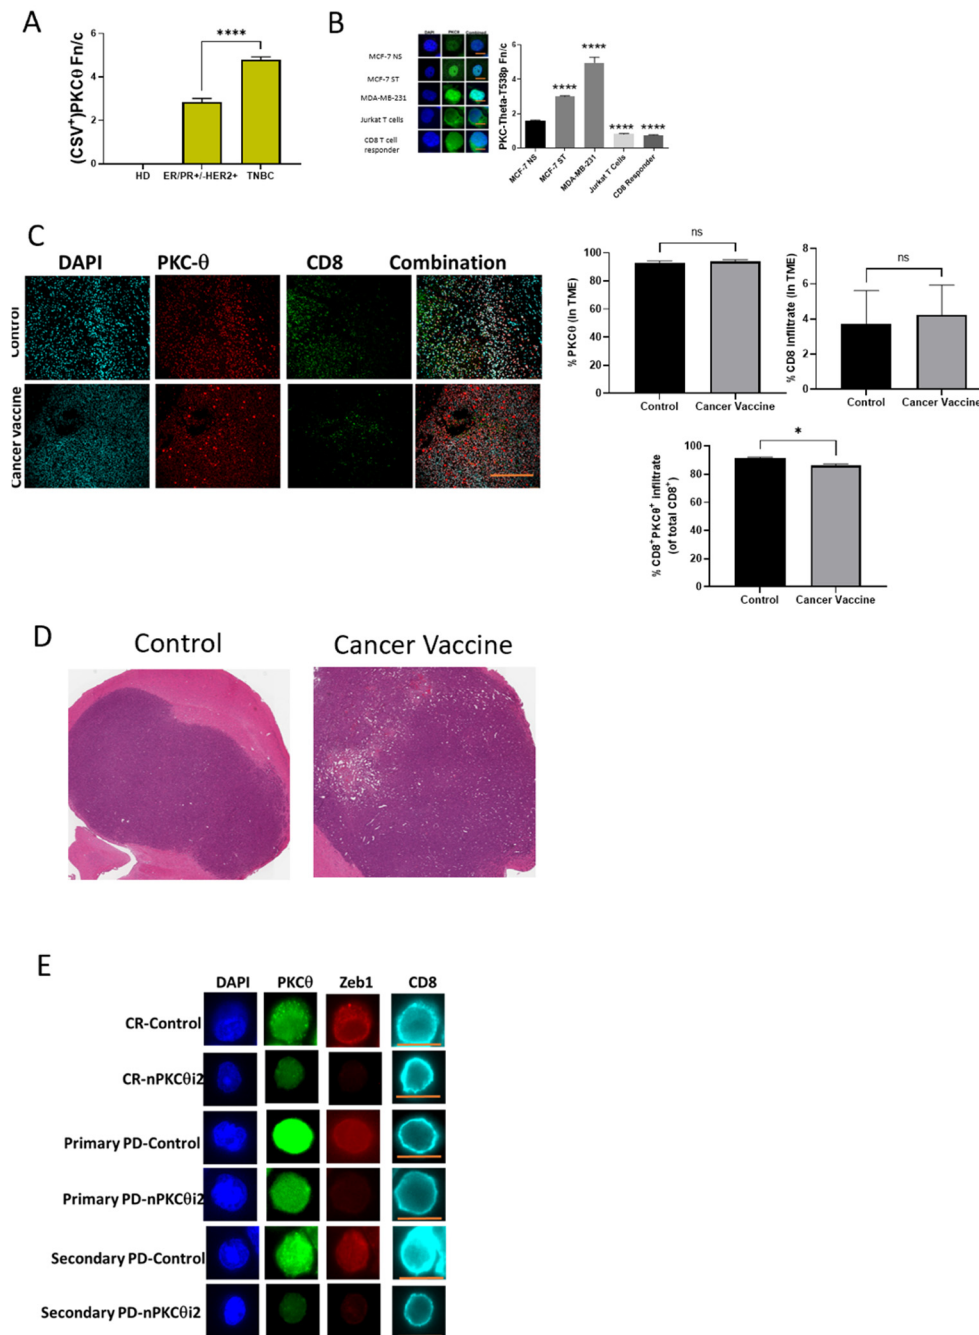

**Figure S5.** (A) CTCs from liquid biopsies from healthy donors (HD) and breast cancer patients: ER/PR+/-HER2+ or TNBC were labelled with antibodies targeting PKC-θ T538p, and the Fn/c for each cohort determined by immunofluorescence analysis. (B) Immunohistofluorescence analysis of PKC-θ expression in human MCF-7 (NS/ST), MDA-MB-231 breast cancer cells, Jurkat T cells, and CD8<sup>+</sup> T cells from an immunotherapy responsive patient. Human MCF-7 epithelial cells (MCF-7epi) were activated with PMA to induce EMT and generate MCF-7 mesenchymal-like (MCF-7mes) breast cancer cells. Bar graphs show the nuclear to cytoplasmic ratio (Fn/c) for PKC-θ phosphorylated at threonine 568 (PKC-θ-Thr568p) (n ≥ 20 cells per group). Representative images are shown for each dataset (left). PKC-θ-Thr568p (green); DAPI (blue) was used to visualize nuclei, scale bar represents 10 μM. (C) Representative FFPE tumor sections from the E0771 brain metastasis mouse model treated with a cancer vaccine or vehicle control. Samples were stained using tyramide staining for PKC-θ and CD8 and imaged using the ASI Digital pathology platform to automatically count population dynamics with automatic thresholding. Graph plots of the % infiltration of total CD8<sup>+</sup> T cells into

scanned tumor sections relative to total tumor cells and the graph plot of the proportion of CD8<sup>+</sup> T cells positive for nuclear PKC- $\theta$  (nPKC $\theta$ <sup>+</sup>) and PD-1. One-ANOVA was used to calculate significant differences, ns = no significance, \* $<0.05$ , \*\*\*\* $<0.0001$ . (D) Representative H&E-stained sections from mice treated with either control or a cancer vaccine matching the immunofluorescence staining in (C). (E) Depicts example images of CD8 cells isolated from melanoma patient liquid biopsies [Responder = complete response (CR) or Resistant (primary = primary resistance, secondary = secondary resistance, PD = progression of disease)] stimulated with PMA/CI and pre-clinically screened with either vehicle control or nPKC- $\theta$ i2. Samples were then fixed and immunofluorescence microscopy was performed on these cells with primary antibodies targeting ZEB1, PKC- $\theta$ , and CD8.



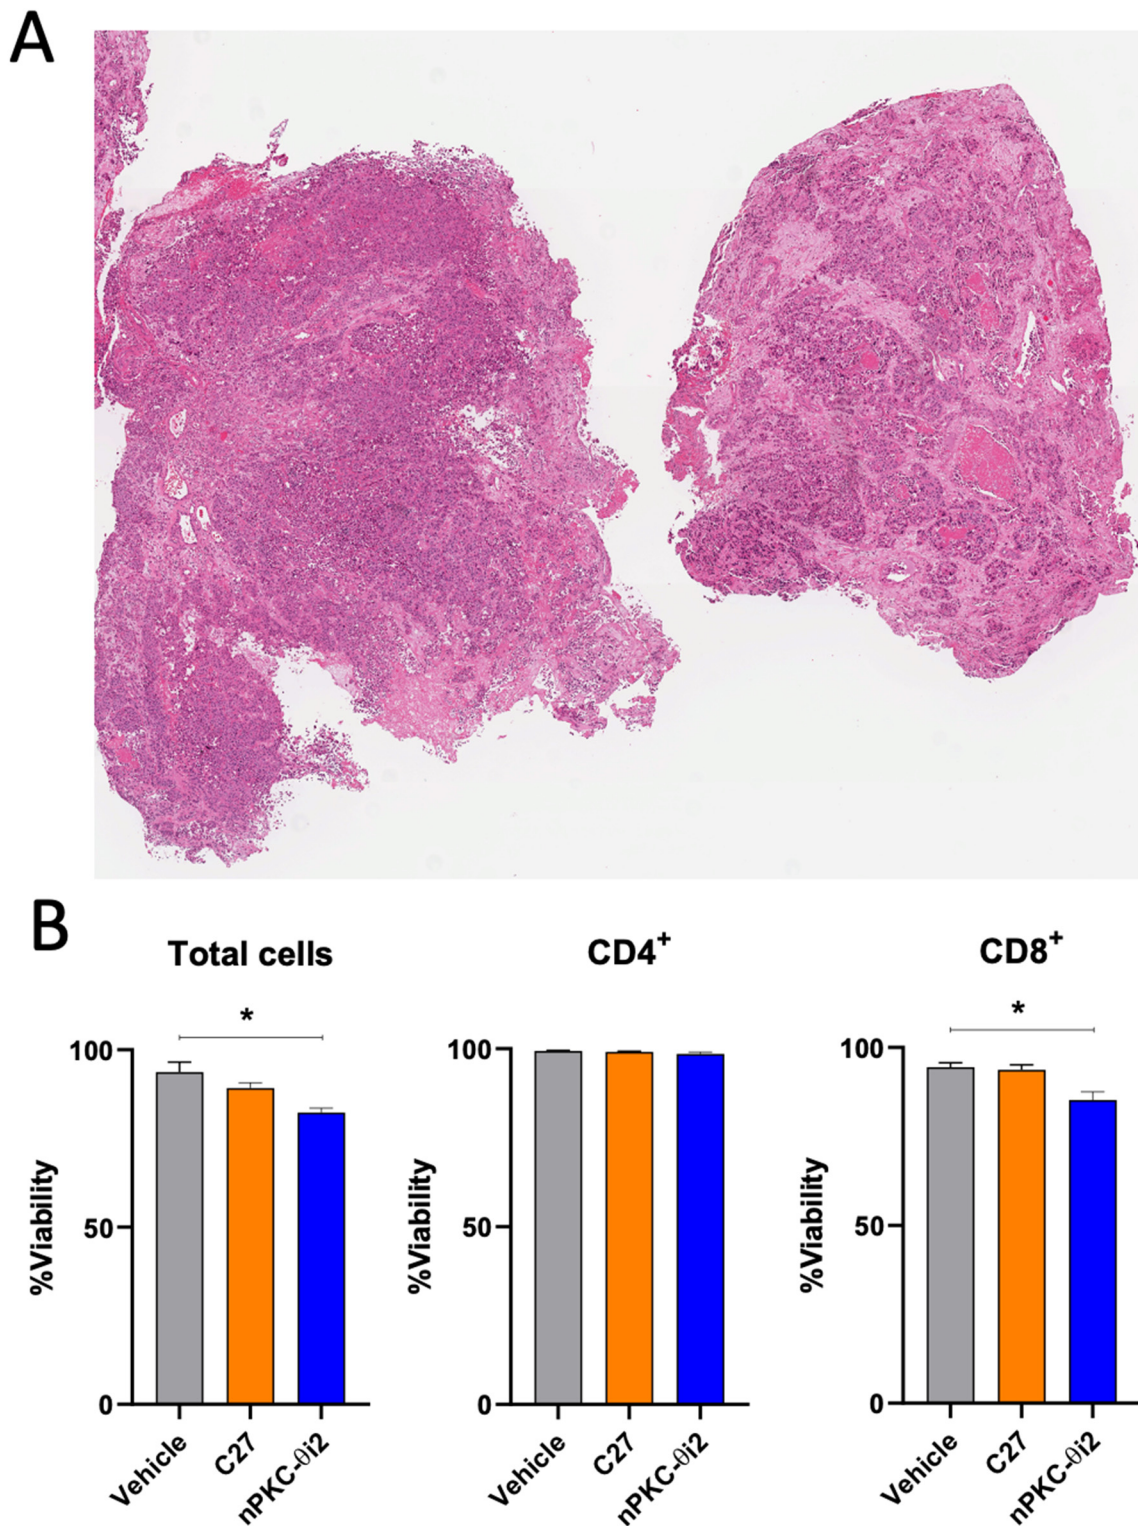

**Figure S6.** (A) Representative H&E-stained sections of a brain metastasis from a stage IV breast cancer patient matching the immunofluorescence staining in Figure 6F. (B) FACS plot showing % cell viability of total PBMCs, CD4<sup>+</sup> T cells, and CD8<sup>+</sup> T cells isolated from healthy donors and treated *ex vivo* with C27 or nPKC-012. Statistical significance is denoted \*  $p \leq 0.05$ . Example images are shown with 20  $\mu$ m scale bar
